# Supplementary material for: Establishing a Standardized DNA Extraction Method Using NaCl from Oral Mucosa Cells for Its Application in Imprinting Diseases Such as Prader–Willi and Angelman Syndromes: A Preliminary Investigation
Source: MDPI journal article supplement (doi:10.3390/genes15050641), 2024-05-18
Supplement: s1 [file s1]

## Additional File S1

The primers were designed to bind only to the converted DNA (treated with bisulfite). Without treatment, there is no way for primers to attach to the region. As discussed in Ferreira et al (2019), both primers can bind to both alleles (see fusion curves) and act as a positive control for bisulfite conversion, a process due to the particularity of annealing in the treated DNA. The reverse primer shows perfect annealing in the two alleles. The forward primer presents a single incompatibility in the non-methylated allele (exchange of T for C) that does not interfere in the amplification capacity since there is still the pairing of ten nucleotides after this incompatibility.

Below is the sequence of the genomic region (sequences ID NG\_012958.1 and NG\_002690.1) containing the *SNRPN* and *SNURF* genes. The CpG islands are in bold type. Wild type: untreated bisulfite DNA

### Wild-Type

tcattc**cggt** gagggagggga gctgggaccc ctgcactg**cg** gcaacaagc **acgcctgcgc** **ggccgc**cagag gcaggctggc **g**gcgatgctc aggc**cg**gggat gtgtg**cg**aag cctg**ccg**ctg ctgcag**cg**ag tctgg**cg**cag agtggag**cg**g **ccg**ccggaga tgctgac**cg**c atctgtctga ggag**cg**gtca gtgac**cg**cagat ggagcgggca aggtcagctg tg**cg**gtggc ttctctcaag agacagcctg gggag**cg**gcc actttattc atcatcattc **cggt**gagggga gggagctggg accc

After DNA conversion, the non-methylated cytosines are converted in thymines, in both alleles. This condition allows the primers to be paired (place indicated by gray rectangles). The color red indicates the mismatch of the primer forward, in the non-methylated allele. For this reason, the presence of amplification is an indication that the DNA conversion worked correctly.

T indicates non-methylated cytosines converted to thymines.

Primers      Sequence      5'-GGATTTTGTATTGCGGTAAATAAG-3'      and      5'-CAACTAACCTTACCCACTCCATC-3'

### Non-methylated allele

tTatt**TT**ggt gagggagggga gTtggga**TTT** TtgTaTtg**Tg** gTaaaTaagT aTgTTtgTgT ggTTgTagag gTaggTtggT gTgTatgTtT aggTggggat gtgtgTgaag TTtgTTgTtg TtgTagTgag tTggTgTag agtggagTgg **TTgTT**ggaga tgTTgaTgT atTgtTtga ggagTggTta gtgaTgTgat ggagTgggTa aggtTagTtg tgTTggtggT ttTtTtTaag agaTagTTtg gggagTggTT aTttttattT atTa

### Methylated allele

tTatt**Tc**ggt gagggagggga gTtggga**TTT** TtgTaTtg**cg** gTaaaTaagT **acgTT**tc**cg**c gg**Tcg**Tagag gTaggTtggc **g**cgTatgTtT aggc**cg**gggat gtgtg**cg**aag TTtg**Tcg**Ttg TtgTag**cg**ag tTtgg**cg**Tag agtggag**cg**g **TcgT**cggaga tgTTtgac**g**T atTgtTtga ggag**cg**gtTa gtgac**cg**cagat ggag**cg**ggTa aggtTagTtg tg**Tc**ggtggT ttTtTtTaag agaTagTTtg gggag**cg**gTT aTttttattT atTa

## Additional File S2

**Table S1.** DNA concentration data, 260/280 and 260/230 absorbance ratios, and CT values from Commercial Kit and NaCl extractions, and CT values from *RNASE P* and *SNRPN-SNURF* genes amplifications.

|          | [DNA] Nandrop |        | [DNA] Qubit |       | ABS 260/280 |      | ABS 260/230 |      | CT <i>SNRPN-SNURF</i> |          | CT <i>RNASE P</i> |          |
|----------|---------------|--------|-------------|-------|-------------|------|-------------|------|-----------------------|----------|-------------------|----------|
| Patients | CK            | NaCl   | CK          | NaCl  | CK          | NaCl | CK          | NaCl | CK                    | NaCl     | CK                | NaCl     |
| 1        | 12,1          | 314,4  | 4,01        | 39,3  | 1,74        | 1,64 | 1,95        | 1,8  | 29,18                 | 31,25205 | 24,43             | 27,16205 |
| 2        | 24,9          | 287,3  | 8,3         | 35,91 | 1,95        | 1,64 | 1,99        | 1,7  | 29,26                 | 31,62    | 24,51             | 27,53    |
| 3        | 16,6          | 213,2  | 5,51        | 26,65 | 1,56        | 1,73 | 2           | 2,2  | 29,45                 | 31,25205 | 24,71             | 27,16205 |
| 4        | 20,2          | 207,2  | 6,62        | 25,9  | 1,69        | 1,74 | 2,1         | 1,7  | 29,23                 | 30,95671 | 24,48             | 26,86671 |
| 5        | 15            | 174,4  | 5,09        | 21,8  | 1,84        | 1,75 | 2           | 2,1  | 29,24                 | 31,30467 | 24,5              | 27,21467 |
| 6        | 13,1          | 237,4  | 4,36        | 29,68 | 1,72        | 1,84 | 2           | 1,6  | 29,34                 | 30,30467 | 24,6              | 26,21    |
| 7        | 23            | 232,5  | 7,62        | 29,06 | 1,89        | 1,67 | 2           | 2,5  | 27,54                 | 29,61429 | 22,79             | 25,52    |
| 8        | 25,6          | 223,1  | 8,52        | 27,89 | 1,85        | 1,69 | 1,97        | 1,69 | 27,44                 | 29,35    | 22,69             | 25,26    |
| 9        | 26,6          | 202,7  | 8,78        | 25,34 | 1,95        | 1,6  | 1,99        | 1,64 | 27,14                 | 28,61429 | 22,39             | 24,52    |
| 10       | 24,6          | 234,8  | 2,18        | 29,35 | 1,82        | 1,69 | 1,98        | 1,65 | 27,689                | 29,25779 | 22,94             | 25,17    |
| 11       | 10,6          | 252,07 | 2,65        | 31,51 | 1,72        | 1,64 | 2,01        | 1,61 | 27,18779              | 29,08776 | 22,44             | 25       |
| 12       | 19            | 19,15  | 6,45        | 2,39  | 1,44        | 1,64 | 2           | 1,6  | 27,87786              | 29,75779 | 23,13             | 25,67    |
| 13       | 30,7          | 35,49  | 10,35       | 4,44  | 1,82        | 1,77 | 2           | 1,6  | 27,94402              | 28,9644  | 23,19             | 24,87    |
| 14       | 17,4          | 15,96  | 5,8         | 2,00  | 1,84        | 1,74 | 2,03        | 1,63 | 27,3944               | 28,6494  | 22,64             | 24,56    |
| 15       | 17,2          | 80,6   | 5,76        | 10,08 | 1,94        | 1,73 | 2,01        | 1,69 | 27,5944               | 29,95632 | 22,8444           | 25,87    |
| 16       | 45            | 176,47 | 14,87       | 22,06 | 2,02        | 1,83 | 1,99        | 1,61 | 29,25563              | 32,97609 | 24,50563          | 28,89    |
| 17       | 18            | 220,11 | 3,25        | 27,51 | 1,75        | 1,67 | 1,98        | 1,64 | 29,61256              | 33,50586 | 24,86256          | 29,42    |
| 18       | 12            | 125,04 | 3,99        | 15,63 | 1,73        | 1,69 | 1,99        | 1,65 | 30,08377              | 33,51687 | 25,33377          | 29,43    |
| 19       | 40,2          | 177,19 | 13,4        | 22,15 | 1,93        | 1,61 | 1,99        | 1,68 | 30,04425              | 34,54925 | 25,29425          | 30,46    |
| 20       | 26,5          | 30,59  | 8,74        | 3,82  | 1,92        | 1,69 | 1,97        | 1,67 | 30,13923              | 35,83009 | 25,38923          | 31,74    |
| 21       | 27,3          | 133,43 | 9,02        | 16,68 | 1,8         | 1,74 | 1,99        | 1,69 | 30,75756              | 35,92466 | 26,00756          | 31,83    |
| 22       | 27,1          | 151,14 | 8,74        | 18,89 | 1,92        | 1,78 | 1,92        | 1,5  | 28,13987              | 33,24836 | 23,38987          | 29,16    |
| 23       | 16,8          | 192,66 | 5,6         | 24,08 | 1,84        | 1,44 | 1,94        | 1,59 | 29,85644              | 33,38955 | 25,10644          | 29,3     |
| 24       | 16,9          | 213,95 | 5,45        | 26,74 | 2,05        | 1,58 | 1,98        | 1,56 | 29,90956              | 33,41968 | 25,15956          | 29,33    |
| 25       | 16,1          | 156,1  | 5,32        | 19,51 | 2,03        | 1,45 | 1,97        | 1,58 | 28,87419              | 32,86865 | 24,12419          | 28,78    |
| 26       | 17,8          | 29,78  | 5,84        | 3,72  | 1,84        | 1,54 | 1,97        | 1,57 | 29,09006              | 32,87124 | 24,34006          | 28,78    |
| 27       | 16            | 8,24   | 5,23        | 1,03  | 2,05        | 1,57 | 1,99        | 1,61 | 29,35381              | 33,01922 | 24,60381          | 28,93    |
| 28       | 16            | 3,82   | 5,33        | 0,48  | 1,85        | 1,62 | 1,96        | 1,62 | 28,74609              | 33,51763 | 23,99609          | 29,43    |
| 29       | 40,5          | 34,91  | 13,5        | 4,36  | 1,9         | 1,45 | 1,95        | 1,65 | 29,32835              | 33,76423 | 24,57835          | 29,67    |
| 30       | 16,6          | 138,64 | 5,41        | 17,33 | 2,1         | 1,47 | 1,97        | 1,67 | 29,53071              | 33,96737 | 24,78071          | 29,87737 |
| 31       | 39,1          | 51,44  | 12,98       | 6,43  | 1,98        | 1,87 | 1,99        | 1,69 | 30,02756              | 32,45756 | 25,27756          | 28,36756 |
| 32       | 13,3          | 71,85  | 4,25        | 8,58  | 1,9         | 1,77 | 1,99        | 1,8  | 27,40987              | 29,12987 | 22,65987          | 25,03987 |
| 33       | 13,9          | 32     | 4,23        | 4     | 2,02        | 1,55 | 1,98        | 1,8  | 27,52644              | 29,24644 | 22,77644          | 25,15644 |
| 34       | 18,2          | 164,83 | 5,91        | 20,14 | 1,69        | 1,66 | 1,99        | 1,6  | 29,17956              | 30,89956 | 24,42956          | 26,80956 |
| 35       | 16,2          | 86,57  | 5,4         | 10,52 | 1,79        | 1,88 | 1,97        | 2,1  | 28,14419              | 29,86419 | 23,39419          | 25,77419 |
| 36       | 18,2          | 14,62  | 5,87        | 2,87  | 2,2         | 1,87 | 1,99        | 1,69 | 28,36006              | 30,08006 | 23,61006          | 25,99006 |
| 37       | 8,8           | 72,92  | 6,12        | 9,11  | 2,17        | 1,85 | 1,98        | 1,61 | 28,62381              | 30,34381 | 23,87381          | 26,25381 |
| 38       | 10,1          | 95,1   | 3,45        | 11,25 | 2,04        | 1,75 | 2,01        | 1,64 | 28,01609              | 29,73609 | 23,26609          | 25,64609 |
| 39       | 20,9          | 47,87  | 6,45        | 5,85  | 1,91        | 1,84 | 2           | 1,66 | 28,59835              | 30,31835 | 23,84835          | 26,22835 |
| 40       | 24,6          | 199,42 | 8,2         | 24,52 | 2,03        | 1,67 | 1,99        | 1,63 | 28,80071              | 30,52071 | 24,05071          | 26,43071 |

|    |      |        |       |       |      |      |      |      |          |          |          |          |
|----|------|--------|-------|-------|------|------|------|------|----------|----------|----------|----------|
| 41 | 16,7 | 62,78  | 5,33  | 7,84  | 2,02 | 1,69 | 1,99 | 1,65 | 28,87022 | 30,59022 | 24,12022 | 26,50022 |
| 42 | 15,9 | 23,61  | 5,3   | 2,95  | 2,01 | 1,6  | 1,94 | 1,66 | 29,40923 | 31,12923 | 24,65923 | 27,03923 |
| 43 | 26,8 | 32,78  | 8,63  | 4,10  | 1,95 | 1,69 | 1,99 | 1,68 | 27,52644 | 29,24644 | 22,77644 | 25,15644 |
| 44 | 14,3 | 113,89 | 4,69  | 14,24 | 1,88 | 1,64 | 1,98 | 1,64 | 28,36006 | 30,08006 | 23,61006 | 25,99006 |
| 45 | 11,7 | 97,69  | 3,87  | 12,21 | 1,91 | 1,64 | 1,99 | 1,64 | 28,59835 | 30,31835 | 23,84835 | 26,22835 |
| 46 | 10,1 | 47,27  | 3,56  | 5,91  | 2,21 | 1,77 | 2,01 | 1,61 | 28,52563 | 30,24563 | 23,77563 | 26,15563 |
| 47 | 15,7 | 290,07 | 5,23  | 36,26 | 1,97 | 1,74 | 2    | 1,61 | 28,01609 | 29,73609 | 23,26609 | 25,64609 |
| 48 | 12,7 | 265,07 | 4,66  | 33,13 | 1,82 | 1,73 | 1,97 | 1,62 | 28,01609 | 29,73609 | 23,26609 | 25,64609 |
| 49 | 35,9 | 191,77 | 10,55 | 23,97 | 2,12 | 1,74 | 1,97 | 1,63 | 28,14419 | 29,86419 | 23,39419 | 25,77419 |
| 50 | 29,6 | 178,07 | 9,48  | 22,26 | 2,02 | 1,87 | 1,95 | 1,65 | 27,40987 | 29,12987 | 22,65987 | 25,03987 |
| 51 | 43,4 | 148,36 | 14,26 | 18,55 | 1,85 | 1,77 | 1,96 | 1,66 | 28,18563 | 29,90563 | 23,43563 | 25,81563 |
| 52 | 58,2 | 212,09 | 19,4  | 26,51 | 1,9  | 1,55 | 1,99 | 1,62 | 28,39126 | 30,11126 | 23,64126 | 26,02126 |
| 53 | 55,3 | 207,59 | 18,43 | 25,95 | 2    | 1,66 | 2,02 | 1,62 | 29,01377 | 30,73377 | 24,26377 | 26,64377 |
| 54 | 49,2 | 203,39 | 16,4  | 25,42 | 2    | 1,88 | 2,08 | 1,68 | 28,97425 | 30,69425 | 24,22425 | 26,60425 |
| 55 | 60,3 | 197,69 | 20,1  | 24,71 | 2    | 1,87 | 2,01 | 1,61 | 29,06923 | 30,78923 | 24,31923 | 26,69923 |
| 56 | 40,3 | 211,31 | 13,43 | 26,41 | 2,01 | 1,85 | 2    | 1,6  | 29,68756 | 31,40756 | 24,93756 | 27,31756 |
| 57 | 41   | 182,67 | 13,67 | 22,83 | 2    | 1,75 | 2    | 1,6  | 27,06987 | 29,78987 | 22,31987 | 25,69987 |
| 58 | 44,5 | 140,67 | 14,83 | 17,58 | 1,99 | 1,84 | 2,01 | 1,66 | 27,18644 | 28,90644 | 22,43644 | 24,81644 |
| 59 | 25,1 | 198,27 | 8,37  | 24,78 | 1,96 | 1,67 | 1,99 | 1,79 | 28,83956 | 31,15956 | 24,08956 | 27,06956 |
| 60 | 20,1 | 199,17 | 6,7   | 24,90 | 1,91 | 1,7  | 1,98 | 1,71 | 27,80419 | 29,52419 | 23,05419 | 25,43419 |
| 61 | 19,7 | 93,87  | 6,57  | 11,73 | 2,22 | 1,71 | 1,98 | 1,75 | 28,02006 | 29,74006 | 23,27006 | 25,65006 |
| 62 | 19,1 | 127,77 | 6,37  | 15,97 | 2,05 | 1,74 | 1,99 | 1,71 | 28,28381 | 30,08006 | 23,53381 | 25,99006 |
| 63 | 15,2 | 425,87 | 5,07  | 53,23 | 1,92 | 1,73 | 1,99 | 1,7  | 27,67609 | 29,39609 | 22,92609 | 25,30609 |
| 64 | 13,8 | 277,87 | 4,6   | 34,73 | 1,87 | 1,72 | 1,99 | 1,7  | 28,25835 | 29,97835 | 23,50835 | 25,88835 |
| 65 | 16,8 | 287,47 | 5,6   | 35,93 | 1,96 | 1,82 | 1,99 | 1,7  | 28,46071 | 31,18071 | 23,71071 | 27,09071 |
| 66 | 23,2 | 210,87 | 7,73  | 26,36 | 2,12 | 1,54 | 1,98 | 1,7  | 28,53022 | 30,25022 | 23,78022 | 26,16022 |
| 67 | 16,3 | 255,67 | 5,43  | 31,96 | 2,18 | 1,53 | 1,95 | 1,7  | 29,06923 | 30,78923 | 24,31923 | 26,69923 |
| 68 | 15,3 | 22,75  | 5,1   | 2,84  | 2,01 | 1,52 | 1,97 | 1,7  | 27,58644 | 29,50644 | 22,83644 | 25,41644 |
| 69 | 23,2 | 39,09  | 7,73  | 4,89  | 1,97 | 1,84 | 1,99 | 1,63 | 28,42006 | 30,34006 | 23,67006 | 26,25006 |
| 70 | 45,4 | 19,56  | 15,13 | 2,45  | 1,84 | 1,72 | 1,99 | 1,65 | 28,65835 | 31,57835 | 23,90835 | 27,48835 |
| 71 | 51   | 84,2   | 17    | 10,53 | 2,1  | 1,46 | 1,99 | 1,66 | 28,58563 | 30,50563 | 23,83563 | 26,41563 |
| 72 | 55   | 180,07 | 18,33 | 22,51 | 2    | 1,63 | 2    | 1,62 | 28,01761 | 30,08609 | 23,26761 | 25,99609 |
| 73 | 27,4 | 223,71 | 9,13  | 27,96 | 1,95 | 1,65 | 1,98 | 1,64 | 28,07609 | 30,00999 | 23,32609 | 25,91999 |
| 74 | 38,7 | 128,64 | 12,90 | 16,08 | 1,82 | 1,67 | 1,99 | 1,69 | 28,20419 | 30,12419 | 23,45419 | 26,03419 |
| 75 | 20,4 | 180,79 | 6,80  | 22,60 | 1,45 | 1,64 | 1,98 | 1,68 | 27,46987 | 29,38987 | 22,71987 | 25,29987 |
| 76 | 19,9 | 34,19  | 6,63  | 4,27  | 1,94 | 1,66 | 1,98 | 1,61 | 28,85563 | 30,77563 | 24,10563 | 26,68563 |
| 77 | 17,8 | 137,03 | 5,93  | 17,13 | 1,99 | 1,78 | 1,94 | 2,1  | 29,06126 | 30,98126 | 24,31126 | 26,89126 |
| 78 | 34,2 | 154,74 | 11,40 | 19,34 | 1,78 | 1,77 | 2    | 1,6  | 29,68377 | 31,60377 | 24,93377 | 27,51377 |
| 79 | 44,7 | 196,26 | 14,90 | 24,53 | 1,83 | 1,63 | 2,12 | 1,72 | 29,64425 | 32,56425 | 24,89425 | 28,47425 |
| 80 | 17   | 217,55 | 5,67  | 27,19 | 1,89 | 1,84 | 2,09 | 1,69 | 29,73923 | 32,65923 | 24,98923 | 28,56923 |
| 81 | 56,5 | 159,7  | 18,83 | 19,96 | 1,89 | 1,6  | 2,11 | 1,71 | 28,35756 | 32,27756 | 23,60756 | 28,18756 |
| 82 | 66   | 33,38  | 22,00 | 4,17  | 1,52 | 1,61 | 2,11 | 1,71 | 27,73987 | 30,65987 | 22,98987 | 26,56987 |
| 83 | 73,3 | 11,84  | 24,43 | 2,58  | 1,84 | 1,58 | 2,01 | 1,61 | 27,85644 | 30,77644 | 23,10644 | 26,68644 |
| 84 | 56,2 | 7,42   | 18,73 | 2,25  | 1,73 | 1,55 | 2    | 1,6  | 29,50956 | 31,42956 | 24,75956 | 27,33956 |
| 85 | 19,4 | 38,51  | 6,47  | 4,81  | 1,87 | 1,76 | 2    | 1,6  | 28,47419 | 30,39419 | 23,72419 | 26,30419 |
| 86 | 20,6 | 142,24 | 6,87  | 17,78 | 2,1  | 1,63 | 1,99 | 1,63 | 28,69006 | 30,61006 | 23,94006 | 26,52006 |

|                    |          |          |           |           |           |           |           |           |           |           |           |           |
|--------------------|----------|----------|-----------|-----------|-----------|-----------|-----------|-----------|-----------|-----------|-----------|-----------|
| 87                 | 66,2     | 55,04    | 22,07     | 6,88      | 2,1       | 1,77      | 1,99      | 1,69      | 28,95381  | 31,87381  | 24,20381  | 27,78381  |
| 88                 | 16,6     | 75,45    | 5,53      | 9,43      | 1,97      | 1,68      | 1,98      | 1,61      | 28,34609  | 30,26609  | 23,59609  | 26,17609  |
| 89                 | 12,7     | 35,6     | 4,23      | 4,45      | 1,98      | 1,8       | 1,99      | 1,64      | 28,92835  | 31,14835  | 24,17835  | 27,05835  |
| 90                 | 22,6     | 168,43   | 7,53      | 21,05     | 1,96      | 1,77      | 2         | 1,65      | 29,13071  | 31,05071  | 24,38071  | 26,96071  |
| 91                 | 14,9     | 90,17    | 4,97      | 11,27     | 2         | 1,48      | 2,01      | 1,68      | 29,20022  | 31,12022  | 24,45022  | 27,03022  |
| 92                 | 45,1     | 18,22    | 15,03     | 2,28      | 1,88      | 1,87      | 1,99      | 1,67      | 29,73923  | 31,65923  | 24,98923  | 27,56923  |
| 93                 | 31,1     | 76,52    | 10,37     | 9,57      | 1,89      | 1,77      | 1,99      | 1,69      | 27,85644  | 31,09644  | 23,10644  | 27,00644  |
| 94                 | 19,8     | 98,7     | 6,60      | 12,34     | 1,79      | 1,67      | 2,01      | 1,62      | 28,69006  | 32,61006  | 23,94006  | 28,52006  |
| 95                 | 19,5     | 51,47    | 6,50      | 6,43      | 1,72      | 1,65      | 2,01      | 1,61      | 28,92835  | 31,84835  | 24,17835  | 27,75835  |
| 96                 | 16,7     | 203,02   | 5,57      | 25,38     | 1,93      | 1,7       | 2         | 1,65      | 28,85563  | 32,77563  | 24,10563  | 28,68563  |
| 97                 | 50,6     | 66,38    | 16,87     | 8,30      | 1,71      | 1,71      | 2         | 1,66      | 28,00101  | 30,26609  | 23,25101  | 26,17609  |
| 98                 | 38,4     | 27,21    | 12,80     | 3,40      | 1,71      | 1,69      | 1,99      | 1,71      | 28,94609  | 31,06609  | 24,19609  | 26,97609  |
| 99                 | 12,8     | 29,78    | 4,27      | 3,72      | 1,82      | 1,64      | 1,97      | 1,57      | 28,87419  | 30,79419  | 24,12419  | 26,70419  |
| 100                | 12,8     | 88,24    | 4,27      | 13,58     | 1,88      | 1,77      | 2,01      | 1,61      | 27,73987  | 30,19874  | 22,98987  | 26,10874  |
| 101                | 16,9     | 66,24    | 5,63      | 13,25     | 2,05      | 1,77      | 2,01      | 1,79      | 28,18563  | 31,12923  | 23,59609  | 26,17609  |
| 102                | 20,6     | 66,87    | 6,87      | 13,37     | 1,92      | 1,74      | 1,99      | 1,68      | 28,39126  | 29,24644  | 24,17835  | 27,05835  |
| 103                | 23,2     | 101,23   | 7,73      | 20,25     | 1,87      | 1,73      | 1,99      | 1,71      | 29,01377  | 30,08006  | 24,38071  | 26,96071  |
| 104                | 29,6     | 185,36   | 9,87      | 37,07     | 1,96      | 1,74      | 2,01      | 2,1       | 28,97425  | 30,31835  | 24,45022  | 27,03022  |
| 105                | 22,6     | 120,36   | 7,53      | 24,07     | 2,12      | 1,87      | 2,01      | 1,6       | 29,06923  | 30,24563  | 24,98923  | 26,46923  |
| 106                | 16,2     | 123,2    | 5,40      | 24,64     | 2,18      | 1,77      | 2         | 1,72      | 29,68756  | 29,73609  | 23,10644  | 26,89644  |
| 107                | 20,23    | 100,2    | 6,74      | 20,04     | 2,01      | 1,55      | 2         | 1,79      | 27,06987  | 29,73609  | 23,94006  | 27,25006  |
| 108                | 21,45    | 100,58   | 7,15      | 20,12     | 1,97      | 1,66      | 1,99      | 1,71      | 27,18644  | 29,86419  | 24,17835  | 26,75835  |
| 109                | 19,88    | 135,65   | 6,63      | 27,13     | 1,84      | 1,88      | 1,94      | 1,71      | 28,83956  | 29,12987  | 24,10563  | 27,45563  |
| 110                | 18,2     | 114,28   | 6,07      | 22,86     | 1,88      | 1,77      | 2,01      | 1,61      | 27,80419  | 29,90563  | 22,98987  | 26,10874  |
| Media              | 26,654   | 132,5846 | 8,6093636 | 17,215938 | 1,9158182 | 1,698     | 1,9937273 | 1,6859091 | 28,594482 | 30,88053  | 23,873405 | 26,878476 |
| Standard Deviation | 15,10742 | 89,68191 | 4,8633436 | 10,796815 | 0,1460285 | 0,1074142 | 0,0320755 | 0,1353601 | 0,8039944 | 1,4770255 | 0,7845616 | 1,4434    |

Ck:Commercial Kit

Additional File S3

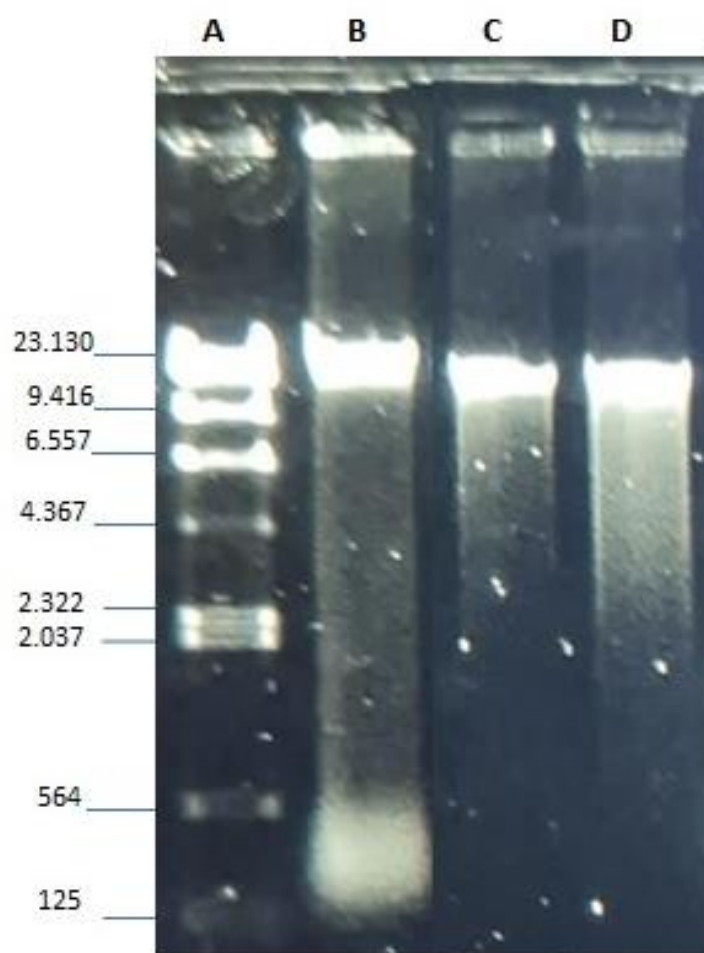

•  
Electrophoresis in 0.8% agarose gel, stained with ethidium bromide (0.5 µg/ml), of genomic DNAs extracted with different methods. In A: Molecular weight marker (λDNA/Hind III fragments, Invitrogen), B: DNA extracted from oral swab by NaCl, C: DNA extracted from peripheral blood with the commercial kit; D: DNA extracted from oral swab with a commercial kit. The molecular mass marker (λDNA/Hind III fragments, Invitrogen) is expressed in bp.
